# Supplementary material
Source: PubMed Central journal article supplement (PMC4643271)
Supplement: mmc1.pdf [file mmc1.pdf]

# Hemagglutinin Spatial Distribution Shifts in Response to Cholesterol in the Influenza Viral Envelope

Marta K. Domanska,<sup>1</sup> Rebecca A. Dunning,<sup>1</sup> Kelly A. Dryden,<sup>1</sup> Katarzyna E. Zawada,<sup>1</sup> Mark Yeager,<sup>1</sup> and Peter M. Kasson<sup>1,\*</sup>

<sup>1</sup>Molecular Physiology and Biological Physics, University of Virginia, Charlottesville, Virginia

## Supporting Information

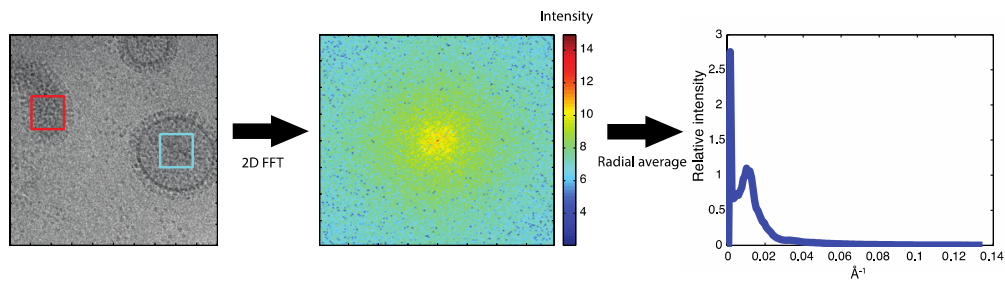

**Figure S1. Stages in processing a cryomicrograph to extract spatial distributions.** Panels show a cryomicrograph region with two virion interiors boxed (of 25 for the entire micrograph), the 2D FFT image of the cyan region, and the spectrum obtained via radial averaging.

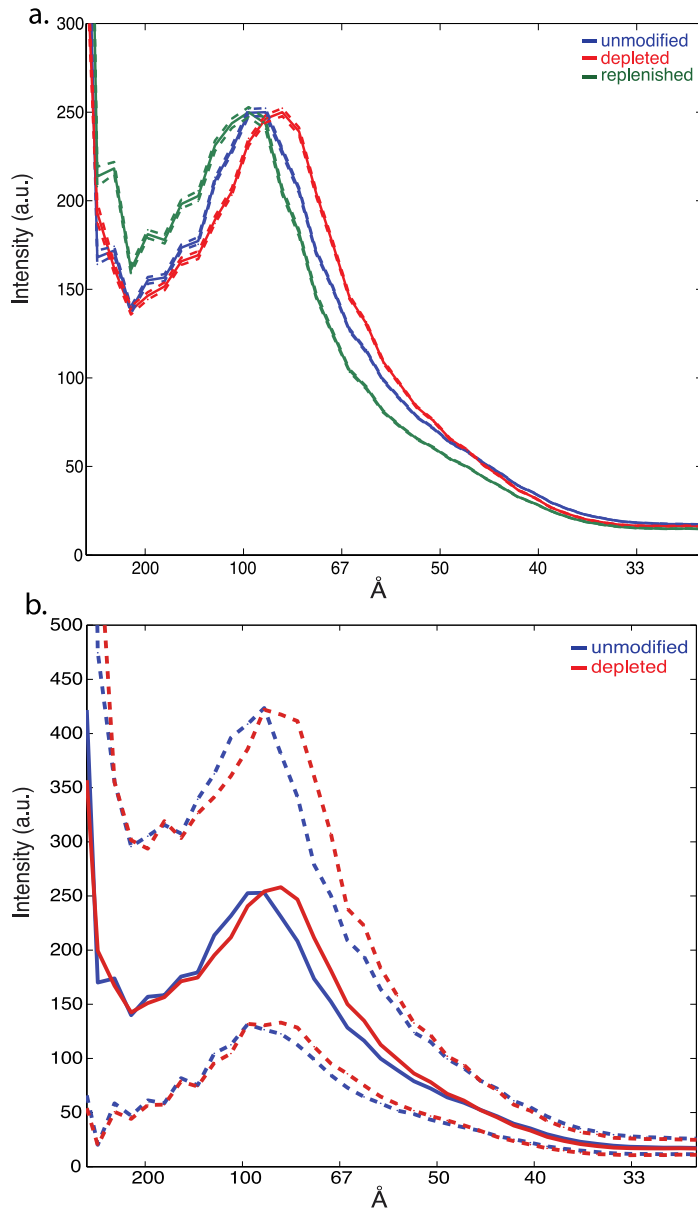

**Figure S2. Error analysis of radial distribution functions.** 95% confidence intervals for the average radial distribution function computed via bootstrap resampling are plotted in dashed lines for panel (a); these overlay the average data and are visible only on close inspection, indicating that the average radial distributions are extremely robust over the large (~4000) number of virions analyzed in each sample. In panel (b), 95% confidence intervals are plotted in dashed lines for individual virion images. As is typical for single-particle electron microscopy data, the individual images show substantial variation in intensity and are typically analyzed only in average form. However, the confidence “envelope” even for single particles clearly shows a lateral shift in the peak corresponding to hemagglutinin distribution from unmodified virus to virus where cholesterol has been extracted with 20 mM M $\beta$ CD.

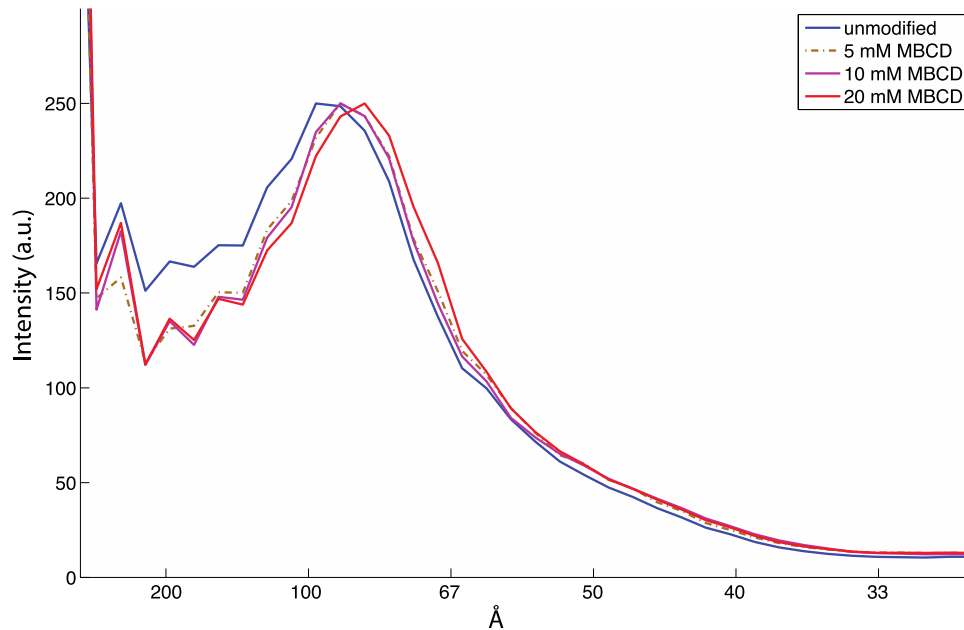

**Figure S3. Radial distribution functions showing hemagglutinin spatial distribution in response to cholesterol.** Average radial distributions of electron density are plotted for unmodified virus and cholesterol-depleted virus with 5 mM, 10, or 20 mM M $\beta$ CD, using a different viral lot from that analyzed in Figure 2. Approximately 400-600 virions were analyzed per condition, resulting in somewhat higher errors than Figure 2, which used ~4000 virions per condition. Cholesterol levels in these samples were 63% of unmodified virus for 5 mM M $\beta$ CD, 12% of unmodified virus for 10 mM M $\beta$ CD, and 4% of unmodified virus for 20 mM M $\beta$ CD. Modes of the HA-HA distribution peaks are 97 Å for unmodified virus, 90 Å for virus that was cholesterol-extracted using either 5 mM or 10 mM M $\beta$ CD, and 84 Å for virus that was cholesterol-extracted using 20 mM M $\beta$ CD.

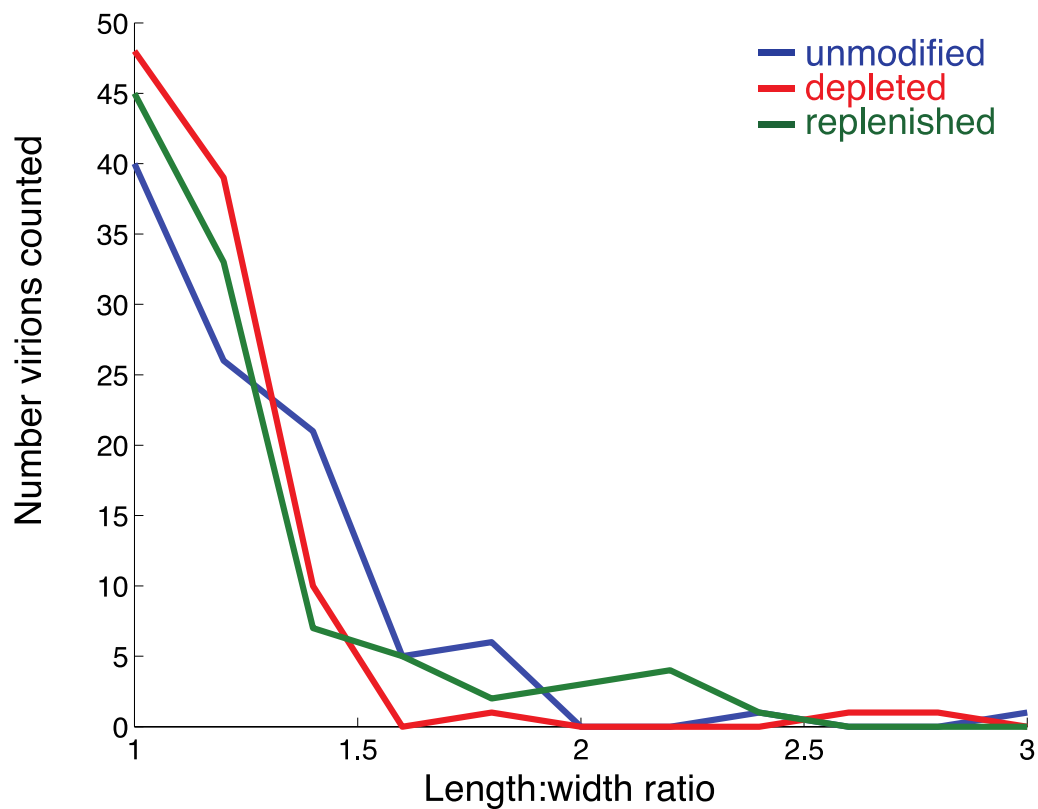

**Figure S4. Length-to-width ratios of virions do not change significantly under cholesterol depletion and re-addition.** Ratios were calculated using elliptical fits to the virions measured in Figure 4 (100 virions per condition). Statistical comparisons were performed using a 2-sample Kolmogorov-Smirnov test with a Bonferroni multiple hypothesis correction.
